# Supplementary material for: Polymeric micelles with π–π conjugated cinnamic acid as lipophilic moieties for doxorubicin delivery
Source: Royal Society of Chemistry journal article supplement (doi:10.1039/c3tb20392a), 2013-01-01
Supplement: c3tb20392a.pdf [file c3tb20392a.pdf]

## Supplementary Information

### Polymeric micelles with $\pi$ - $\pi$ conjugated cinnamic acid as lipophilic moieties for doxorubicin delivery

Yusi Lai, Ying Lei, Xianghui Xu, Yuanlin Li, Bin He\*, Zhongwei Gu\*

National Engineering Research Center for Biomaterials  
Sichuan University  
Chengdu 610064 China

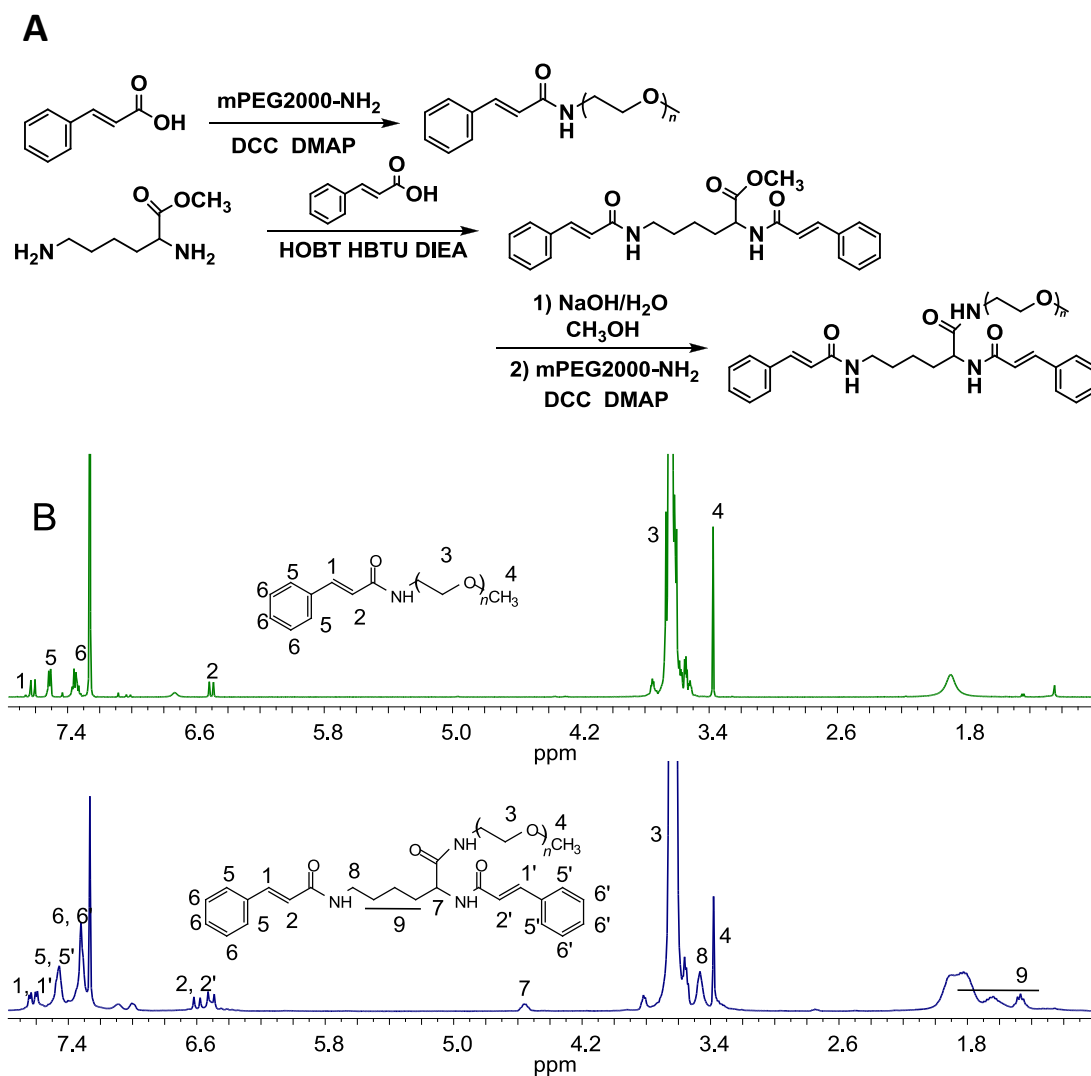

**Fig. S1** The synthetic route (A) and <sup>1</sup>H NMR spectra (400M Hz, CDCl<sub>3</sub>) of mPEG-CIN and mPEG-Lys-DCIN amphiphiles (B).

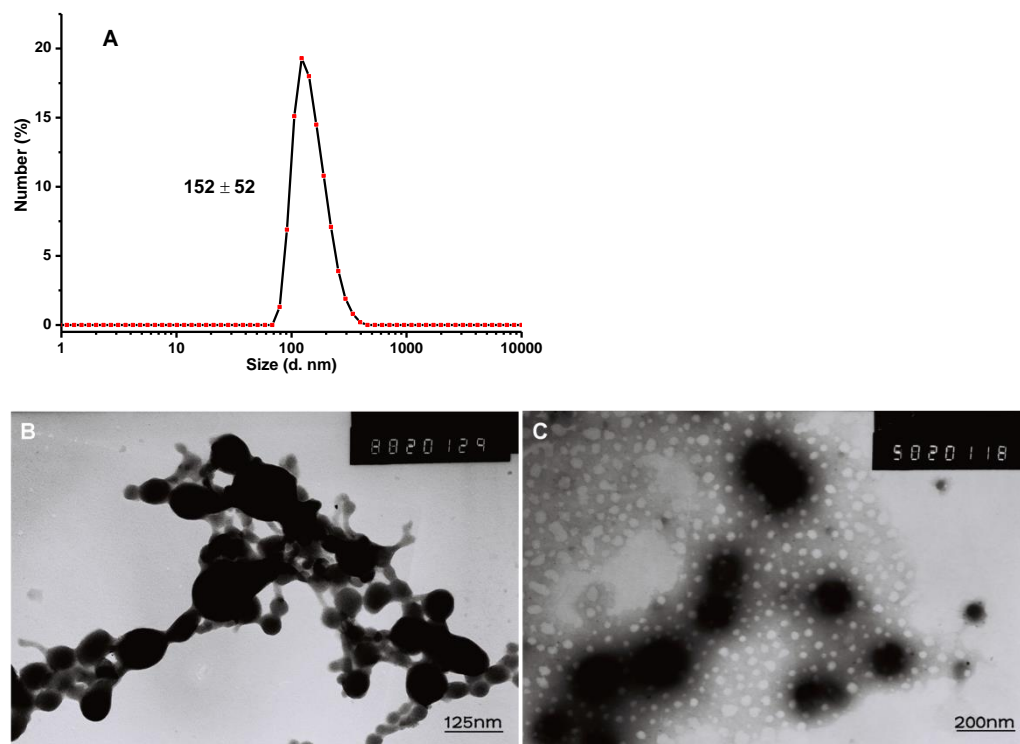

**Fig. S2** The DLS measurement and TEM images of mPEG-DCIN micelles. (A) DLS result of DOX-loaded micelles; (B) TEM graph of blank micelles; (C) TEM graph of DOX-loaded micelles.

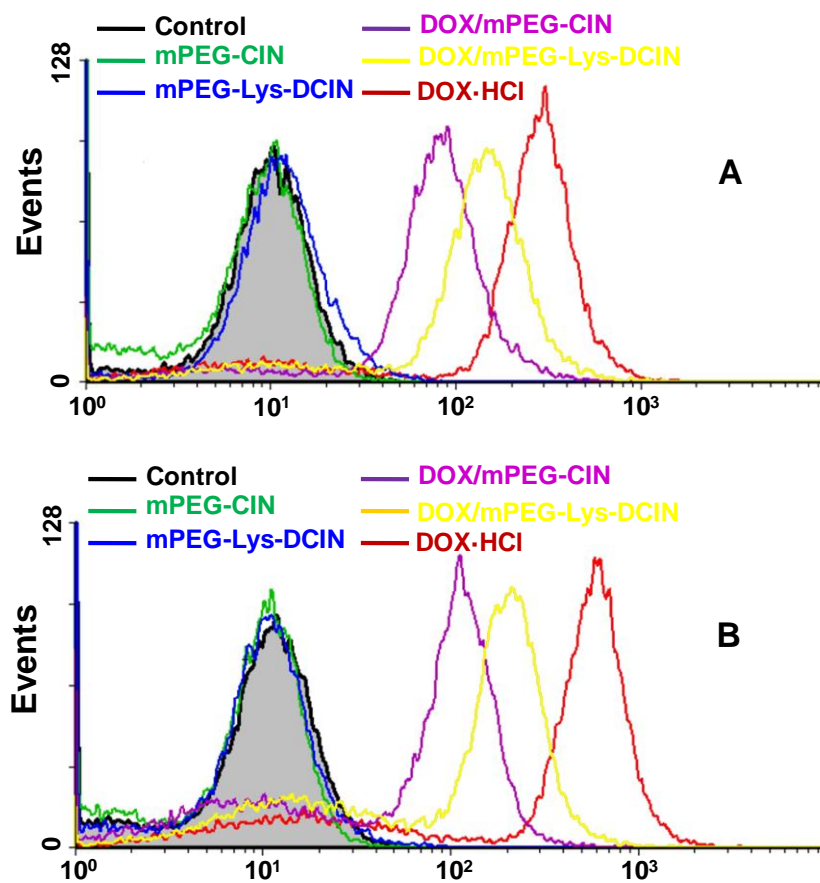

**Fig. S3.** The flow cytometry results of 4T1 cells treated with DOX•HCl, blank and DOX-loaded micelles for 1 (A) and 3 (B) h. The concentration of DOX was 10  $\mu\text{g}/\text{mL}$ .

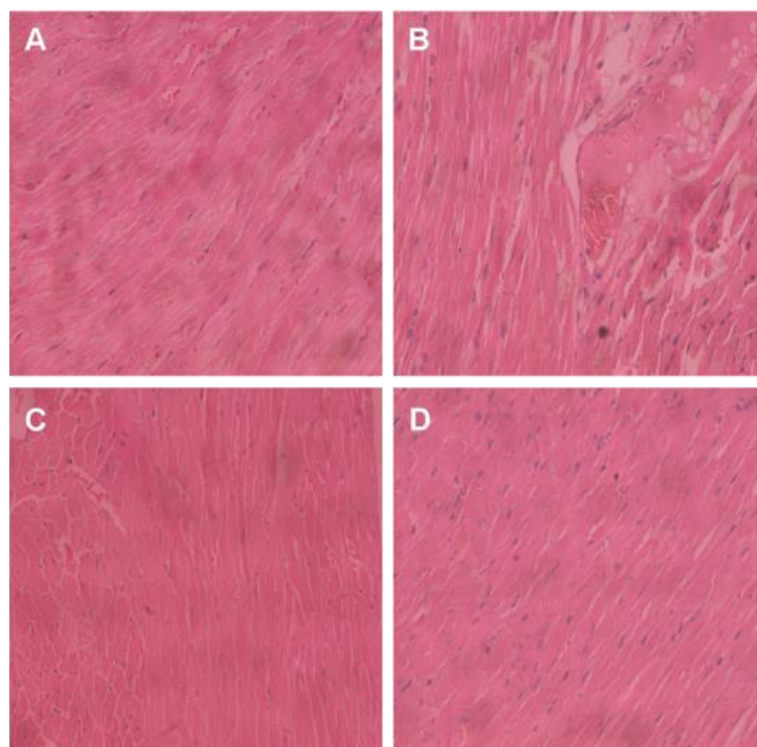

**Fig. S4.** The histologic images (20×) of heart tissues treated with saline (A), DOX·HCl (B), DOX-loaded mPEG-CIN (C) and DOX-loaded mPEG-Lys-DCIN (D) micelles.
